## Supplementary Information

### Supplementary Text

*Lasius americanus* case study: urban evolution versus biogeographic clines in thermal tolerance

#### Urban evolution component

##### Colony collections

For the urban evolution study, we collected queenright colonies of the North American woodland ant, *Lasius americanus* (formerly, *Lasius alienus*, Schär et al., 2018). We collected newly founded colonies inhabiting tree nuts (acorn and hickory nuts) that allowed us to retain the entire colony. Mature colonies inhabit soil, leaf litter and rotting logs (Ellison et al., 2012), which frequently prevents the collection of entire colonies. Colony collection dates spanned 6 June to 7 June 2016. At the time of collection, colonies contained one queen and 3 to 40 workers (mean  $\pm$  1 SD =  $16.1 \pm 9.72$ ). Colonies originated from sites in the greater Knoxville, Tennessee, USA area (36° N latitude). Rural sites were located within a 2km radius of I.C. King park (35.8912, -83.9473) and urban sites were located within a 2km radius of the University of Tennessee Agriculture Education Center (35.8982, -83.9567). Rural sites were those designated as 0% developed impervious surface area (ISA) whereas urban sites were those with 40-60% ISA. The growing season temperature difference in the microclimates that acorn ants inhabit between these specific urban and rural sites is 3.64 °C (Diamond et al., 2018).

##### Laboratory rearing

Field-collected colonies were randomly assigned to one of five temperature treatments in laboratory growth chambers. Note that because colonies generally require the presence of the queen for the production of new workers, we were unable to split members of a single colony across the temperature treatments. The temperature treatments each include a  $\pm$  5 °C diurnal temperature shift from a baseline daytime temperature of 21, 23, 25, 27, or 29 °C, synced with a 14:10 L:D photoperiod (following Diamond et al., 2018). Colonies were housed separately and were provided with a continuous supply of sugar water and dead mealworms. Colonies were held within the growth chambers for a minimum of 10 weeks to allow a new cohort of workers to be generated. Lab-born workers were then assessed for heat and cold tolerance.

##### Physiological trait assays

We used the critical thermal maximum (CT<sub>max</sub>) and the critical thermal minimum (CT<sub>min</sub>) as our measures of heat and cold tolerance, respectively. For CT<sub>max</sub>, worker ants were placed individually into 1.5 mL Eppendorf tubes which were inserted into a dry-block incubator. The initial temperature of the incubator was set at 34 °C and the temperature was raised by 1 °C every minute until the loss of muscular coordination, at which point the CT<sub>max</sub> (in °C) was recorded. We employed a similar procedure to assess CT<sub>min</sub>, except that the initial temperature of the incubator was set at 16 °C and the temperature was decreased by 1 °C every minute until the loss of muscular coordination, at which point the CT<sub>min</sub> (in °C) was recorded. We assessed heat and cold tolerance of a total of 296 individuals from 5 rural colonies and 12 urban colonies. Because the assessment of heat and cold tolerance is destructive, we were unable to measure heat

and cold tolerance on the same individual. As a consequence, 149 of the total thermal tolerance estimates were for heat tolerance and 147 were for cold tolerance. These individual estimates were generally well balanced across the colony units. For each colony, a minimum of 10 workers were assessed for heat tolerance and another 10 workers for cold tolerance except for one colony where 5 workers were assessed for heat tolerance and 4 workers for cold tolerance.

#### Data analysis

To quantify the evolution of heat and cold tolerance in response to urban heat island effects, we constructed linear mixed effects models. Separate models were constructed for heat and cold tolerance. We developed models that included the main effects of source population (urban versus rural), rearing temperature (treated as a continuous variable), and their interaction. Colony identity was treated as a random intercept in all models.

#### Biogeographic cline component

##### Colony collections

For the biogeographic cline study, we used previously published data on the thermal tolerance of *Lasius americanus* (Diamond and Chick, 2018). Although these methods are described in Diamond and Chick (2018), we provide a brief summary here. We collected colony fragments (*i.e.*, workers only) from *L. americanus* colonies inhabiting forests of eastern North America. There were 24 sites from 33.1 to 42.6 °N latitude, representing a span of 6.9 to 18.1 °C in mean annual temperature. All collection sites were in natural areas, far from urban heat island effects. Colony fragment collections occurred during the growing season (May-September) 2014. Colony fragments were housed individually according to their colony of origin.

##### Physiological trait assays

Colony fragments were held for a minimum of 48 hours at ambient room temperature (~25 °C), and thermal tolerance assays were performed within one week of collection from the field. The methods used to assess  $CT_{max}$  and  $CT_{min}$  were the same dynamic temperature ramping protocol as for the urban evolution study component described above. A total of 246 workers were assessed for thermal tolerance including 131 for heat tolerance and 115 for cold tolerance.

#### Data analysis

To quantify the effect of latitudinal variation in temperature on heat and cold tolerance, we constructed linear mixed effects models. We performed separate models for heat and cold tolerance. In each model, mean annual temperature (in °C) was included as a continuous predictor. Colony identity was treated as a random intercept.

#### *Thermal tolerance trait change across urbanization and biogeographic gradients*

##### Literature search

We began our analysis of the magnitude and direction of thermal tolerance trait change across urbanization gradients versus biogeographic gradients by identifying studies on either the

evolution of thermal tolerance in cities, or, urban-driven phenotypic shifts in thermal tolerance. Using these studies as a foundation, we then sought out corresponding data on biogeographic clines in thermal tolerance for that particular species. Urban evolution and phenotypic trait change studies focused on thermal tolerance traits were identified from a recent review of the topic (Diamond and Martin, 2020) and a literature search using Google Scholar with combinations of the following terms: “urban”, “urbanization”, “land-use change”, “city”, “human settlement”, “evolution”, “adaptation”, “thermal tolerance”, “CT<sub>max</sub>”, “CT<sub>min</sub>”, “heat tolerance”, “cold tolerance”, “chill coma recovery”, “urban heat island”, “temperature”, “phenotype”, and “trait change”. The last literature search was performed in April 2020. In some cases, thermal tolerance trait data across biogeographic clines in temperature were not available for the species identified in a given urban study. When we could not find exact species matches between urban and biogeographic studies, we found the phylogenetically closest relative for which biogeographic data were available. In some cases, we were able to identify sister species such as between *Anolis cristatellus* and *Anolis pulchellus*, although in others, the comparison group was quite distant such as between *Apis mellifera* and *Bombus* sp. (see Table S2 for urbanization-biogeographic cline species pairs).

#### Study inclusion criteria

We placed limits on the studies for inclusion in our analysis with respect to the type of thermal tolerance estimate used. Because we aimed to directly interpret the magnitude of trait change per °C change in environmental temperature, we limited our analyses to those studies that reported heat and cold tolerance estimates (specifically CT<sub>max</sub> and CT<sub>min</sub>) in units of °C, rather than other measures such as time to recover from heat or cold stress. All studies from our literature search that met these criteria were included in our analysis.

#### Data analysis

Our general analytical approach was to standardize the magnitude and direction of thermal tolerance trait change by the magnitude of warming across urbanization and biogeographic gradients (either latitude or elevation). For heat tolerance, values were positive if urban or low latitude/elevation heat tolerance exceeded rural or high latitude/elevation heat tolerance, that is, when urban or low latitude/elevation populations exhibited a greater capacity to tolerate heat stress (urban or low latitude/elevation CT<sub>max</sub> > rural or high latitude/elevation CT<sub>max</sub>). For cold tolerance, values were negative if rural or high latitude/elevation cold tolerance exceeded urban or low latitude/elevation cold tolerance, that is, when urban or low latitude/elevation populations lost their capacity to tolerate cold stress (urban or low latitude/elevation CT<sub>min</sub> > rural or high latitude/elevation CT<sub>min</sub>).

All environmental temperature differences were expressed as changes in mean temperature across urban versus rural habitats or across latitude/elevation gradients. Differences in temperature between warmed urban sites experiencing heat island effects and rural sites were taken from values reported by the authors in each study. Differences in mean annual temperature across latitude or elevation were obtained from WorldClim (Fick and Hijmans, 2017).

When only the endpoints of the biogeographic gradient were available, we computed the difference of high versus low latitude or elevation trait values (always subtracting the cool environment from the warm environment) and divided by the difference in mean annual temperature across the two sites. When more than two biogeographic data points were available, we computed the slope of the relationship between the trait values and the mean annual

temperature of each site. In the case that multiple urbanization gradient trait and environmental data were available, we re-used the same biogeographic trait and environmental data for each corresponding urbanization gradient. We performed a similar data categorization for the urbanization gradient. When data were reported as urban versus rural (or nonurban), we computed the trait and environmental differences of these two sites (always subtracting the rural environment from the warm environment), and when data were reported for multiple sites within the same urbanization gradient, we computed the slope of the relationship between the trait value and environmental temperature.

When possible, we used raw datasets provided by the authors either in supplementary material of the relevant journal article(s) or through publicly available data repositories. In the case that raw data were not available, we extracted either raw data or summary statistics (trait means) from the article figures and/or tables. To extract data from figures, we used the WebPlotDigitizer software (Rohatgi, 2019). In all cases, our experimental units for analysis were based on the data reported by the authors of each study. When possible, we reported the trait values for each combination of study, city and species. However, some authors reported aggregate statistics with no accompanying raw data, for example, trait data pooled across multiple urbanization gradients, in which case, we followed the conventions of the authors and analyzed the urbanization versus biogeographic trait change per °C environmental temperature change at the level of the entire group of cities.

Given the variation in data sources for this analysis, it was not possible to obtain meaningful standard errors in both the trait change and environmental temperature change across urbanization and biogeographic gradients. As a consequence, we report and analyze mean trait change in heat and cold tolerance across urbanization and biogeographic gradients. Specifically, we did not weight estimates by their standard error during analysis. We performed a Chi-squared contingency table test, counting the number of cases where the urbanization and biogeographic responses were in the same direction versus different directions, and testing whether these counts were significantly different from a 50/50 expectation. We analyzed heat and cold tolerance traits together to have sufficient cell counts to satisfy the assumptions of the Chi-squared contingency analysis, although we did find comparable results when we separated the analyses on the basis of tolerance trait type. In addition, we performed a simple linear model of the tolerance trait change (separately for heat and cold tolerance) as a function of urbanization versus biogeographic cline. This model allowed us to assess whether the magnitude of trait change was significantly greater for either the urbanization cline or for the biogeographic cline. All of the data that formed the basis of these analyses can be found in Table S2.

### *Meta-analysis of phenotypic versus evolved shifts in thermal tolerance*

#### Literature search and study inclusion criteria

We used the same literature search as the one for the analysis of trait change across urbanization versus biogeographic gradients. Because we were interested in how thermal tolerance traits responded to urbanization when only phenotypes could be measured versus genetic changes could be demonstrated, we were able to expand the range of studies we considered to not only include  $CT_{\max}$  and  $CT_{\min}$  but other related traits including heat stress resistance time, heat stress recovery time, and chill coma recovery time.

Phenotypic studies involved assessment of thermal tolerance trait from field-caught individuals (or individuals that were reared briefly in the laboratory, but not for a complete generation). By contrast, evolutionary studies involved laboratory common garden experiments in which the study organism was reared for at least one generation in the laboratory prior to assessment of thermal tolerance traits. In these cases, evolutionary divergence can be disentangled from plastic responses to urban heat island effects.

#### Data analysis

We performed a formal meta-analysis of the magnitude and direction of phenotypic versus evolved shifts in thermal tolerance traits across urbanization gradients. Our effect size for the meta-analysis was computed as the standardized mean difference between urban and rural trait values using Cohen's  $d$ . When possible, we computed Cohen's  $d$  from the raw data using the *cohen.d* function from the *effsize* library in R (Torchiano, 2020). In other cases, we computed Cohen's  $d$  from means and variances extracted from figures (again, using WebPlotDigitizer), tables, the article text (mostly for information on sample sizes), and from linear model test statistics. Here, we used the *fes*, *mes*, and *tes* functions from the *compute.es* library (Del Re, 2013).

Because Cohen's  $d$  is defined as the standardized mean difference between two groups, in some cases this required continuous data taken along an urbanization gradient to be transformed into a binary variable of urban versus rural. When this occurred, we followed the authors' assessment of site groupings into more urbanized sites versus more natural sites.

Our final meta-analysis dataset included a total of 39 individual effect sizes for the difference in thermal tolerance traits between urban and rural populations. There were 24 estimates for phenotypic data only and 15 estimates for which evolutionary change was demonstrated. There were 25 estimates of heat tolerance and 14 estimates of cold tolerance. Combined, these estimates came from 15 individual studies and from 15 different species, though not each study reported data on a single species. Some studies reported data from multiple species; and for a couple species in the meta-analysis, multiple studies were focused on the same species. We conducted a formal random effects meta-analysis using the *rma* function from the *metafor* library in R (Viechtbauer, 2010). Because we computed all values of Cohen's  $d$  either from raw or summary data, we were able to include their associated measurement error variances in our meta-analytic models. We included two moderators in our meta-analytic model, including the type of thermal tolerance trait (heat tolerance versus cold tolerance) and the type of variation (whether only phenotypic data were available versus whether evolution, *i.e.* genetic changes among populations, could be demonstrated). All of the data that formed the basis of these analyses can be found in Table S3.

#### *Evolutionary divergence in thermal tolerance versus plasticity*

##### Literature search and study inclusion criteria

Our final analysis explored the magnitude and direction of evolutionary divergence in thermal tolerance traits versus the magnitude and direction of thermal plasticity. To accomplish this, we used a paired design, identifying species for which data on evolutionary divergence of

thermal tolerance traits in response to urbanization and thermal plasticity of tolerance traits were available.

We used the results of the literature search for the analysis of trait change across urbanization versus biogeographic gradients to identify studies with evolutionary change in thermal tolerance traits across urbanization gradients. We then restricted this list of studies to those that not only compute evolved differences between urban and rural populations but also the plastic response to temperature. We computed the magnitude and direction of evolutionary divergence as the difference in trait means between urban and rural populations, always subtracting the rural from the urban trait mean. Note that we left these values as the mean trait difference between urban and rural populations; we did not standardize these evolutionary divergence measures by the magnitude of warming across the urban heat island gradient as we did in the urban versus biogeographic trait change analysis. We adopted this approach so that the bivariate means and standard errors for evolved and plastic shifts in thermal tolerance would be directly interpretable. We followed the conventions we established earlier for our other analyses, in that a gain of heat tolerance in response to urban warming was assigned a positive value, and a loss of cold tolerance in response to urban warming was assigned a negative value.

#### Data analysis

We computed thermal tolerance plasticity as the slope of the relationship between the trait and laboratory rearing temperature, that is, plasticity is expressed as the rate of trait change per °C of warming. We preserved the direction of plasticity, such that slopes are allowed to be either positive or negative in response to warming. We used formal meta-analytical models (using the *rma* function from the *metafor* library as described above) to test whether evolutionary divergence in heat and cold tolerance traits and thermal plasticity were significantly different from zero. We also used formal meta-analysis with moderators to test whether there was a significant association between evolutionary divergence and thermal plasticity, and whether urban versus rural population thermal plasticity was significantly different across populations. All of the data that formed the basis of these analyses can be found in Table S4.

## Supplementary Tables

**Table S1.** Estimates, standard errors, test statistics and *P*-values from models of temperature effects on heat tolerance ( $CT_{\max}$ ) and cold tolerance ( $CT_{\min}$ ) of *Lasius americanus*. For the urbanization gradient, the results of linear mixed effects models with the predictors of rearing temperature, habitat type and their interaction plus a random intercept of colony identity are provided. For the biogeographic gradient, the results of linear mixed effects models with the predictor of mean annual temperature plus a random intercept of colony identity are provided.

| Gradient      | Tolerance trait | Model term                   | Estimate | SE     | <i>F</i> | <i>P</i> |
|---------------|-----------------|------------------------------|----------|--------|----------|----------|
| Urbanization  | $CT_{\max}$     | Intercept                    | 41.9     | 0.968  | 473000   | < 0.0001 |
|               |                 | Temperature treatment        | 0.025    | 0.0385 | 16.1     | 0.00203  |
|               |                 | Habitat type (rural - urban) | -2.21    | 1.21   | 82.8     | < 0.0001 |
|               |                 | Temperature × Habitat        | 0.138    | 0.0486 | 8.08     | 0.016    |
|               | $CT_{\min}$     | Intercept                    | 3.9      | 1.16   | 7040     | < 0.0001 |
|               |                 | Temperature treatment        | 0.08     | 0.0463 | 8.15     | 0.0156   |
|               |                 | Habitat type (rural - urban) | 0.238    | 1.47   | 25.5     | 0.000373 |
|               |                 | Temperature × Habitat        | 0.0233   | 0.059  | 0.157    | 0.7      |
| Biogeographic | $CT_{\max}$     | Intercept                    | 36.5     | 0.701  | 72600    | < 0.0001 |
|               |                 | Mean annual temperature      | 0.447    | 0.0606 | 54.3     | < 0.0001 |
|               | $CT_{\min}$     | Intercept                    | -1.24    | 0.484  | 1060     | < 0.0001 |
|               |                 | Mean annual temperature      | 0.397    | 0.0413 | 92.1     | < 0.0001 |

**Table S2.** Thermal tolerance trait change across urbanization and biogeographic gradients.

| Urbanization         |                         |                           | Biogeographic gradient    |                      |                         |                           |                | Trait data            |                |                                  |                                   |
|----------------------|-------------------------|---------------------------|---------------------------|----------------------|-------------------------|---------------------------|----------------|-----------------------|----------------|----------------------------------|-----------------------------------|
| Study citation       | Type of study           | Species                   | City or region            | Study citation       | Type of study           | Species                   | Cline location | Latitude or elevation | Tolerance type | Urbanization trait change per °C | Biogeographic trait change per °C |
| Diamond et al., 2018 | lab<br>common<br>garden | Temnothorax curvispinosus | Cleveland, Ohio, USA      | Diamond et al., 2018 | lab<br>common<br>garden | Temnothorax curvispinosus | Eastern USA    | latitude              | CTmin          | 0.314                            | 0.346                             |
| Diamond et al., 2017 | lab<br>common<br>garden | Temnothorax curvispinosus | Cleveland, Ohio, USA      | Diamond et al., 2018 | lab<br>common<br>garden | Temnothorax curvispinosus | Eastern USA    | latitude              | CTmin          | 0.253                            | 0.346                             |
| Diamond et al., 2018 | lab<br>common<br>garden | Temnothorax curvispinosus | Cleveland, Ohio, USA      | Diamond et al., 2018 | lab<br>common<br>garden | Temnothorax curvispinosus | Eastern USA    | latitude              | CTmax          | 0.080                            | 0.131                             |
| Diamond et al., 2017 | lab<br>common<br>garden | Temnothorax curvispinosus | Cleveland, Ohio, USA      | Diamond et al., 2018 | lab<br>common<br>garden | Temnothorax curvispinosus | Eastern USA    | latitude              | CTmax          | 0.228                            | 0.131                             |
| Diamond et al., 2018 | lab<br>common<br>garden | Temnothorax curvispinosus | Cincinnati, Ohio, USA     | Diamond et al., 2018 | lab<br>common<br>garden | Temnothorax curvispinosus | Eastern USA    | latitude              | CTmin          | -0.501                           | 0.346                             |
| Diamond et al., 2018 | lab<br>common<br>garden | Temnothorax curvispinosus | Cincinnati, Ohio, USA     | Diamond et al., 2018 | lab<br>common<br>garden | Temnothorax curvispinosus | Eastern USA    | latitude              | CTmax          | -0.002                           | 0.131                             |
| Diamond et al., 2018 | lab<br>common<br>garden | Temnothorax curvispinosus | Knoxville, Tennessee, USA | Diamond et al., 2018 | lab<br>common<br>garden | Temnothorax curvispinosus | Eastern USA    | latitude              | CTmin          | 0.594                            | 0.346                             |
| Diamond et al., 2018 | lab<br>common<br>garden | Temnothorax curvispinosus | Knoxville, Tennessee, USA | Diamond et al., 2018 | lab<br>common<br>garden | Temnothorax curvispinosus | Eastern USA    | latitude              | CTmax          | 0.065                            | 0.131                             |
| Martin et al., 2019  | lab<br>common<br>garden | Temnothorax curvispinosus | Cleveland, Ohio, USA      | Diamond et al., 2018 | lab<br>common<br>garden | Temnothorax curvispinosus | Eastern USA    | latitude              | CTmax          | 0.375                            | 0.131                             |
| Martin et al., 2019  | lab<br>common<br>garden | Temnothorax curvispinosus | Cleveland, Ohio, USA      | Diamond et al., 2018 | lab<br>common<br>garden | Temnothorax curvispinosus | Eastern USA    | latitude              | CTmin          | 0.398                            | 0.346                             |



|                                 |                   |                           |                          |                         |                  |                           |                |           |       |        |        |
|---------------------------------|-------------------|---------------------------|--------------------------|-------------------------|------------------|---------------------------|----------------|-----------|-------|--------|--------|
| Yilmaz et al., in press         | lab common garden | Oniscus asellus           | Cleveland, Ohio, USA     | Castañeda et al., 2004  | field caught     | Porcellio laevis          | Chile          | latitude  | CTmin | 1.723  | 0.522  |
| Yilmaz et al., in press         | lab common garden | Oniscus asellus           | Cleveland, Ohio, USA     | Castañeda et al., 2004  | field caught lab | Porcellio laevis          | Chile          | latitude  | CTmax | 0.545  | -0.241 |
| Brans et al., 2017              | common garden lab | Daphnia magna             | Flanders, Belgium        | Geerts et al., 2015     | common garden    | Daphnia magna             | Western Europe | latitude  | CTmax | 0.525  | 0.026  |
| This paper                      | common garden lab | Lasius alienus            | Tennessee, USA           | Diamond and Chick, 2018 | field caught     | Lasius alienus            | Eastern USA    | latitude  | CTmax | 0.263  | 0.447  |
| This paper                      | common garden     | Lasius alienus            | Tennessee, USA           | Diamond and Chick, 2018 | field caught     | Lasius alienus            | Eastern USA    | latitude  | CTmin | 0.172  | 0.397  |
| Warren et al., 2018             | field caught      | Aphaenogaster rudis/picea | Buffalo, New York, USA   | Diamond and Chick, 2018 | field caught     | Aphaenogaster rudis/picea | Eastern USA    | latitude  | CTmax | 0.353  | 0.525  |
| Warren et al., 2018             | field caught      | Aphaenogaster rudis/picea | New York, USA            | Diamond and Chick, 2018 | field caught     | Aphaenogaster rudis/picea | Eastern USA    | latitude  | CTmin | -0.882 | 0.512  |
| Sánchez-Echeverría et al., 2019 | field caught      | Apis mellifera            | Pachuca, Hidalgo, Mexico | Oyen et al., 2016       | field caught     | Bombus sp.                | Western USA    | elevation | CTmin | 0.377  | 0.319  |
| Sánchez-Echeverría et al., 2019 | field caught      | Apis mellifera            | Pachuca, Hidalgo, Mexico | Oyen et al., 2016       | field caught     | Bombus sp.                | Western USA    | elevation | CTmax | 0.151  | 0.494  |
| Burdine and McCluney, 2019      | field caught      | Apis mellifera            | Toledo, Ohio, USA        | Oyen et al., 2016       | field caught     | Bombus sp.                | Western USA    | elevation | CTmax | 1.683  | 0.494  |
| Burdine and McCluney, 2019      | field caught      | Bombus impatiens          | Toledo, Ohio, USA        | Oyen et al., 2016       | field caught     | Bombus sp.                | Western USA    | elevation | CTmax | 1.546  | 0.494  |
| Burdine and                     | field caught      | Agapostemon sericeus      | Toledo, Ohio, USA        | Oyen et al., 2016       | field caught     | Bombus sp.                | Western USA    | elevation | CTmax | 0.492  | 0.494  |

|                                     |                 |                       |                              |                |                 |                      |                |           |       |       |       |  |
|-------------------------------------|-----------------|-----------------------|------------------------------|----------------|-----------------|----------------------|----------------|-----------|-------|-------|-------|--|
| McCluney,<br>2019                   |                 |                       |                              |                |                 |                      |                |           |       |       |       |  |
| Campbell-<br>Staton et<br>al., 2020 | field<br>caught | Anolis<br>crisatellus | Aguadilla,<br>Puerto<br>Rico | Hertz,<br>1979 | field<br>caught | Anolis<br>pulchellus | Puerto<br>Rico | elevation | CTmax | 0.295 | 0.333 |  |
| Campbell-<br>Staton et<br>al., 2020 | field<br>caught | Anolis<br>crisatellus | Puerto<br>Rico               | Hertz,<br>1979 | field<br>caught | Anolis<br>pulchellus | Puerto<br>Rico | elevation | CTmax | 0.395 | 0.333 |  |
| Campbell-<br>Staton et<br>al., 2020 | field<br>caught | Anolis<br>crisatellus | Mayagüez,<br>Puerto<br>Rico  | Hertz,<br>1979 | field<br>caught | Anolis<br>pulchellus | Puerto<br>Rico | elevation | CTmax | 0.274 | 0.333 |  |
| Campbell-<br>Staton et<br>al., 2020 | field<br>caught | Anolis<br>crisatellus | San Juan,<br>Puerto<br>Rico  | Hertz,<br>1979 | field<br>caught | Anolis<br>pulchellus | Puerto<br>Rico | elevation | CTmax | 0.114 | 0.333 |  |

**Table S3.** Data used in the meta-analysis of phenotypic versus evolved shifts in thermal tolerance. Rows are in same order as Fig. 3, from top to bottom.

| Study citation                  | Species              | City or region           | Trait data source           | R function to obtain effect size | Tolerance type | Tolerance moderator | Generation   | Phenotype versus evolution | Cohen's d | Lower 95% CI | Upper 95% CI |
|---------------------------------|----------------------|--------------------------|-----------------------------|----------------------------------|----------------|---------------------|--------------|----------------------------|-----------|--------------|--------------|
| Burdine and McCluney, 2019      | Agapostemon sericeus | Toledo, Ohio, USA        | raw                         | cohen.d                          | CTmax          | max                 | Field caught | phenotype                  | 0.39      | -0.36        | 1.15         |
| Campbell-Staton et al., 2020    | Anolis cristatellus  | Aguadilla, Puerto Rico   | figure (mean, se, n)        | mes                              | CTmax          | max                 | Field caught | phenotype                  | 0.59      | -0.12        | 1.29         |
| Campbell-Staton et al., 2020    | Anolis cristatellus  | Arecibo, Puerto Rico     | figure (mean, se, n)        | mes                              | CTmax          | max                 | Field caught | phenotype                  | 0.79      | 0.16         | 1.43         |
| Campbell-Staton et al., 2020    | Anolis cristatellus  | Mayagüez, Puerto Rico    | figure (mean, se, n)        | mes                              | CTmax          | max                 | Field caught | phenotype                  | 1.32      | 0.60         | 2.04         |
| Campbell-Staton et al., 2020    | Anolis cristatellus  | San Juan, Puerto Rico    | figure (mean, se, n)        | mes                              | CTmax          | max                 | Field caught | phenotype                  | 0.34      | -0.29        | 0.97         |
| Warren et al., 2018             | Aphaenogaster rudis  | Buffalo, New York, USA   | raw                         | cohen.d                          | CTmax          | max                 | Field caught | phenotype                  | 0.86      | -0.39        | 2.11         |
| Warren et al., 2018             | Aphaenogaster rudis  | Buffalo, New York, USA   | raw                         | cohen.d                          | CTmin          | min                 | Field caught | phenotype                  | -0.06     | -1.29        | 1.17         |
| Sánchez-Echeverría et al., 2019 | Apis mellifera       | Pachuca, Hidalgo, Mexico | text, test statistic (t, n) | tes                              | CTmax          | max                 | Field caught | phenotype                  | 0.29      | -0.49        | 1.08         |
| Burdine and McCluney, 2019      | Apis mellifera       | Toledo, Ohio, USA        | raw                         | cohen.d                          | CTmax          | max                 | Field caught | phenotype                  | 0.22      | -0.53        | 0.98         |
| Sánchez-Echeverría et al., 2019 | Apis mellifera       | Pachuca, Hidalgo, Mexico | text, test statistic (t, n) | tes                              | CTmin          | min                 | Field caught | phenotype                  | -0.92     | -1.74        | -0.11        |

|                             |                                  |                            |                                       |         |                             |     |              |           |       |       |       |
|-----------------------------|----------------------------------|----------------------------|---------------------------------------|---------|-----------------------------|-----|--------------|-----------|-------|-------|-------|
| Angilletta et al., 2007     | <i>Atta sexdens rubropilosa</i>  | São Paulo, Brazil          | text, summary statistic (mean, se, n) | mes     | Heat stress resistance time | max | Field caught | phenotype | 0.74  | 0.48  | 1.01  |
| Angilletta et al., 2007     | <i>Atta sexdens rubropilosa</i>  | São Paulo, Brazil          | text, summary statistic (mean, se, n) | mes     | Chill coma recovery time    | min | Field caught | phenotype | 0.06  | -0.26 | 0.37  |
| Burdine and McCluney, 2019  | <i>Bombus impatiens</i>          | Toledo, Ohio, USA          | raw                                   | cohen.d | CTmax                       | max | Field caught | phenotype | 0.54  | -0.25 | 1.34  |
| Nguyen et al., 2020         | <i>Cryptotympana atrata</i>      | Seoul, South Korea         | raw                                   | cohen.d | CTmax                       | max | Field caught | phenotype | 0.14  | -0.19 | 0.47  |
| Nguyen et al., 2020         | <i>Hyalessa fuscata</i>          | Seoul, South Korea         | raw                                   | cohen.d | CTmax                       | max | Field caught | phenotype | 0.94  | 0.68  | 1.20  |
| Andrew et al., 2019         | <i>Iridomyrmex purpureus</i>     | New South Wales, Australia | raw                                   | cohen.d | CTmax                       | max | Field caught | phenotype | -0.16 | -0.55 | 0.24  |
| Andrew et al., 2019         | <i>Iridomyrmex purpureus</i>     | New South Wales, Australia | raw                                   | cohen.d | CTmin                       | min | Field caught | phenotype | -0.15 | -0.55 | 0.24  |
| Rivera-Ordonez et al., 2019 | <i>Oophaga pumilio</i>           | La Selva, Costa Rica       | raw                                   | cohen.d | CTmax                       | max | Field caught | phenotype | 0.45  | -0.11 | 1.01  |
| Diamond et al., 2017        | <i>Temnothorax curvispinosus</i> | Cleveland, Ohio, USA       | raw                                   | cohen.d | CTmax                       | max | Field caught | phenotype | 0.60  | 0.25  | 0.94  |
| Martin et al., 2019         | <i>Temnothorax curvispinosus</i> | Cleveland, Ohio, USA       | raw                                   | cohen.d | CTmax                       | max | Field caught | phenotype | 1.75  | 1.31  | 2.18  |
| Diamond et al., 2017        | <i>Temnothorax curvispinosus</i> | Cleveland, Ohio, USA       | raw                                   | cohen.d | CTmin                       | min | Field caught | phenotype | -0.59 | -0.93 | -0.25 |
| Martin et al., 2019         | <i>Temnothorax curvispinosus</i> | Cleveland, Ohio, USA       | raw                                   | cohen.d | CTmin                       | min | Field caught | phenotype | -1.26 | -1.67 | -0.85 |
| Bar-Ziv and Scharf, 2018    | <i>Vermileo sp.</i>              | Tel Aviv, Israel           | text, test statistic (F, n)           | fes     | Heat stress recovery time   | max | Field caught | phenotype | 0.20  | -0.24 | 0.64  |
| Bar-Ziv and Scharf, 2018    | <i>Vermileo sp.</i>              | Tel Aviv, Israel           | text, test statistic (F, n)           | fes     | Chill coma recovery time    | min | Field caught | phenotype | -0.26 | -0.68 | 0.16  |

|                         |                           |                           |                          |         |       |     |     |           |       |       |       |
|-------------------------|---------------------------|---------------------------|--------------------------|---------|-------|-----|-----|-----------|-------|-------|-------|
| Brans et al., 2017      | Daphnia magna             | Flanders, Belgium         | figure (raw data points) | cohen.d | CTmax | max | F2+ | evolution | 1.75  | 0.78  | 2.72  |
| This study              | Lasius alienus            | USA Knoxville, Tennessee, | raw                      | cohen.d | CTmax | max | F1  | evolution | 1.90  | 1.21  | 2.59  |
| This study              | Lasius alienus            | USA Cleveland,            | raw                      | cohen.d | CTmin | min | F1  | evolution | -1.10 | -1.72 | -0.48 |
| Yilmaz et al., in press | Oniscus asellus           | Ohio, USA                 | raw                      | cohen.d | CTmax | max | F1  | evolution | 0.76  | 0.28  | 1.25  |
| Yilmaz et al., in press | Oniscus asellus           | Ohio, USA                 | raw                      | cohen.d | CTmin | min | F1  | evolution | -0.39 | -0.86 | 0.09  |
| Diamond et al., 2018    | Temnothorax curvispinosus | Cincinnati, Ohio, USA     | raw                      | cohen.d | CTmax | max | F1  | evolution | -0.01 | -0.23 | 0.21  |
| Diamond et al., 2018    | Temnothorax curvispinosus | Cleveland, Ohio, USA      | raw                      | cohen.d | CTmax | max | F1  | evolution | 0.49  | 0.28  | 0.71  |
| Diamond et al., 2017    | Temnothorax curvispinosus | Cleveland, Ohio, USA      | raw                      | cohen.d | CTmax | max | F1  | evolution | 0.41  | 0.07  | 0.76  |
| Martin et al., 2019     | Temnothorax curvispinosus | Cleveland, Ohio, USA      | raw                      | cohen.d | CTmax | max | F2+ | evolution | 2.08  | 1.63  | 2.53  |
| Diamond et al., 2018    | Temnothorax curvispinosus | Tennessee, USA            | raw                      | cohen.d | CTmax | max | F1  | evolution | 0.30  | 0.08  | 0.53  |
| Diamond et al., 2018    | Temnothorax curvispinosus | Cincinnati, Ohio, USA     | raw                      | cohen.d | CTmin | min | F1  | evolution | 0.53  | 0.30  | 0.75  |
| Diamond et al., 2017    | Temnothorax curvispinosus | Cleveland, Ohio, USA      | raw                      | cohen.d | CTmin | min | F1  | evolution | -1.53 | -1.92 | -1.14 |
| Diamond et al., 2018    | Temnothorax curvispinosus | Cleveland, Ohio, USA      | raw                      | cohen.d | CTmin | min | F1  | evolution | -0.89 | -1.11 | -0.67 |
| Martin et al., 2019     | Temnothorax curvispinosus | Cleveland, Ohio, USA      | raw                      | cohen.d | CTmin | min | F2+ | evolution | -1.23 | -1.64 | -0.82 |
| Diamond et al., 2018    | Temnothorax curvispinosus | Knoxville, Tennessee, USA | raw                      | cohen.d | CTmin | min | F1  | evolution | -1.52 | -1.77 | -1.26 |

**Table S4.** Evolutionary divergence in thermal tolerance versus thermal plasticity. Evolutionary divergence values represent the change in mean thermal tolerance trait values between urban versus rural populations. Thermal plasticity values represent the change in critical temperature per °C increase in laboratory rearing temperature.

| Study citation          | Species                          | Tolerance type | Evolutionary divergence (mean) | Evolutionary divergence (se) | Rural thermal plasticity (slope) | Rural thermal plasticity (se) | Urban thermal plasticity (slope) | Urban thermal plasticity (se) |
|-------------------------|----------------------------------|----------------|--------------------------------|------------------------------|----------------------------------|-------------------------------|----------------------------------|-------------------------------|
| Brans et al., 2017      | <i>Daphnia magna</i>             | CTmax          | 1.182                          | 0.273                        | 0.261                            | 0.057                         | 0.204                            | 0.072                         |
| Diamond et al., 2017    | <i>Temnothorax curvispinosus</i> | CTmax          | 0.487                          | 0.276                        | 0.237                            | 0.047                         | 0.289                            | 0.031                         |
| Diamond et al., 2017    | <i>Temnothorax curvispinosus</i> | CTmin          | -1.152                         | 0.166                        | -0.153                           | 0.038                         | -0.055                           | 0.035                         |
| Diamond et al., 2018    | <i>Temnothorax curvispinosus</i> | CTmax          | 0.238                          | 0.191                        | 0.075                            | 0.030                         | 0.153                            | 0.027                         |
| Diamond et al., 2018    | <i>Temnothorax curvispinosus</i> | CTmax          | -0.004                         | 0.168                        | 0.094                            | 0.022                         | 0.080                            | 0.033                         |
| Diamond et al., 2018    | <i>Temnothorax curvispinosus</i> | CTmax          | 0.354                          | 0.110                        | 0.085                            | 0.020                         | 0.117                            | 0.019                         |
| Diamond et al., 2018    | <i>Temnothorax curvispinosus</i> | CTmin          | -2.162                         | 0.416                        | -0.466                           | 0.040                         | -0.583                           | 0.070                         |
| Diamond et al., 2018    | <i>Temnothorax curvispinosus</i> | CTmin          | 0.807                          | 0.356                        | -0.094                           | 0.045                         | -0.121                           | 0.069                         |
| Diamond et al., 2018    | <i>Temnothorax curvispinosus</i> | CTmin          | -1.397                         | 0.394                        | -0.369                           | 0.059                         | -0.325                           | 0.056                         |
| This study              | <i>Lasius americanus</i>         | CTmax          | 1.500                          | 0.247                        | 0.025                            | 0.038                         | 0.157                            | 0.033                         |
| This study              | <i>Lasius americanus</i>         | CTmin          | -0.933                         | 0.251                        | -0.080                           | 0.041                         | -0.103                           | 0.039                         |
| Yilmaz et al., in press | <i>Oniscus asellus</i>           | CTmax          | 0.566                          | 0.142                        | 0.028                            | 0.027                         | 0.049                            | 0.023                         |
| Yilmaz et al., in press | <i>Oniscus asellus</i>           | CTmin          | -1.930                         | 0.676                        | -0.703                           | 0.088                         | -0.579                           | 0.105                         |

## References

- Andrew, N. R., Miller, C., Hall, G., Hemmings, Z. and Oliver, I.** (2019). Aridity and land use negatively influence a dominant species' upper critical thermal limits. *PeerJ* **6**, e6252.
- Angilletta, M. J., Jr, Wilson, R. S., Niehaus, A. C., Sears, M. W., Navas, C. A. and Ribeiro, P. L.** (2007). Urban physiology: city ants possess high heat tolerance. *PLoS ONE* **2**, e258.
- Bar-Ziv, M. A. and Scharf, I.** (2018). Thermal acclimation is not induced by habitat-of-origin, maintenance temperature, or acute exposure to low or high temperatures in a pit-building wormlion (*Vermileo* sp.). *J Therm Biol* **74**, 181–186.
- Brans, K. I., Jansen, M., Vanoverbeke, J., Tüzün, N., Stoks, R. and De Meester, L.** (2017). The heat is on: Genetic adaptation to urbanization mediated by thermal tolerance and body size. *Glob Change Biol* 5218–5227.
- Burdine, J. D. and McCluney, K. E.** (2019). Differential sensitivity of bees to urbanization-driven changes in body temperature and water content. *Sci Rep* **9**, 1–10.
- Campbell-Staton, S. C., Winchell, K. M., Rochette, N. C., Fredette, J., Maayan, I., Schweizer, R. M. and Catchen, J.** (2020). Parallel selection on thermal physiology facilitates repeated adaptation of city lizards to urban heat islands. *Nat Ecol Evol* **4**, 652–658.
- Castañeda, L. E., Lardies, M. A. and Bozinovic, F.** (2004). Adaptive latitudinal shifts in the thermal physiology of a terrestrial isopod. *Evol Ecol Res* **6**, 579–593.
- Del Re, A.** (2013). *compute.es: Compute Effect Sizes*. <https://cran.r-project.org/package=compute.es>
- Diamond, S. E. and Chick, L.** (2018). The Janus of macrophysiology: stronger effects of evolutionary history, but weaker effects of climate on upper thermal limits are reversed for lower thermal limits in ants. *Curr Zool* **64**, 223–230.
- Diamond, S. E. and Martin, R. A.** (2020). Evolutionary consequences of the urban heat island. In *Urban Evolutionary Biology*, pp. 91–110. Oxford, New York: Oxford University Press.
- Diamond, S. E., Chick, L. D., Perez, A., Strickler, S. A. and Martin, R. A.** (2017). Rapid evolution of ant thermal tolerance across an urban-rural temperature cline. *Biol J Linn Soc* **121**, 248–257.
- Diamond, S. E., Chick, L. D., Perez, A., Strickler, S. A. and Martin, R. A.** (2018). Evolution of thermal tolerance and its fitness consequences: parallel and non-parallel responses to urban heat islands across three cities. *Proc R Soc B* **285**, 20180036.

- Ellison, A. M., Gotelli, N. J., Farnsworth, E. J. and Alpert, G. D.** (2012). *A Field Guide to the Ants of New England*. Yale University Press.
- Fick, S. E. and Hijmans, R. J.** (2017). WorldClim 2: new 1-km spatial resolution climate surfaces for global land areas. *Int J Climatol* **37**, 4302–4315.
- Geerts, A. N., De Meester, L. and Stoks, R.** (2015). Heat tolerance and its evolutionary potential along a latitudinal gradient in *Daphnia magna*. *Evol Ecol Res* **16**, 517–528.
- Hertz, P. E.** (1979). Sensitivity to high temperatures in three west Indian grass anoles (Sauria, Iguanidae), with a review of heat sensitivity in the genus *Anolis*. *Comp Biochem Physiol A* **63**, 217–222.
- Martin, R. A., Chick, L. D., Yilmaz, A. R. and Diamond, S. E.** (2019). Evolution, not transgenerational plasticity, explains the divergence of acorn ant thermal tolerance across an urban-rural temperature cline. *Evol Appl* **12**, 1678–1687.
- Nguyen, H. Q., Serret, H., Bae, Y., Ji, S., Chae, S., Kim, Y. I., Ha, J. and Jang, Y.** (2020). Not all cicadas increase thermal tolerance in response to a temperature gradient in metropolitan Seoul. *Sci Rep* **10**, 1–12.
- Oyen, K. J., Giri, S. and Dillon, M. E.** (2016). Altitudinal variation in bumble bee (*Bombus*) critical thermal limits. *J Therm Biol* **59**, 52–57.
- Rivera-Ordóñez, J. M., Nowakowski, A. J., Manansala, A., Thompson, M. E. and Todd, B. D.** (2019). Thermal niche variation among individuals of the poison frog, *Oophaga pumilio*, in forest and converted habitats. *Biotropica* **51**, 747–756.
- Rohatgi, A.** (2019). *WebPlotDigitizer*. <https://automeris.io/WebPlotDigitizer>
- Sánchez-Echeverría, K., Castellanos, I., Mendoza-Cuenca, L., Zuria, I. and Sánchez-Rojas, G.** (2019). Reduced thermal variability in cities and its impact on honey bee thermal tolerance. *PeerJ* **7**, e7060.
- Schär, S., Talavera, G., Espadaler, X., Rana, J. D., Andersen, A. A., Cover, S. P. and Vila, R.** (2018). Do Holarctic ant species exist? Trans-Beringian dispersal and homoplasy in the Formicidae. *J Biogeogr* **45**, 1917–1928.
- Torchiano, M.** (2020). *effsize: Efficient Effect Size Computation*. <https://CRAN.R-project.org/package=effsize>
- Viechtbauer, W.** (2010). Conducting meta-analyses in R with the metafor package. *J Stat Softw* **36**, 1–48.
- Warren, R. J., Bayba, S. and Krupp, K. T.** (2018). Interacting effects of urbanization and coastal gradients on ant thermal responses. *J Urban Ecol* **4**, juy026.
- Yilmaz, A. R., Diamond, S. E. and Martin, R. A.** (in press). Evidence for the evolution of thermal tolerance, but not desiccation tolerance, in response to hotter, drier city conditions in a cosmopolitan, terrestrial isopod. *Evol Appl*.
